# Supplementary material
Source: PubMed Central journal article supplement (PMC9348546)
Supplement: NIHMS1809047-supplement-1809047_Sup_tab_1.pdf [file NIHMS1809047-supplement-1809047_Sup_tab_1.pdf]

**Supplementary Table 1: Adipose cell size distribution at baseline and post-overfeeding**

| <b>Subject</b> | <b>Percentage of Small Adipocytes</b> |                         | <b>Peak Diameter of Large Adipocytes</b> |                         |
|----------------|---------------------------------------|-------------------------|------------------------------------------|-------------------------|
|                | <b>Baseline</b>                       | <b>Post-Overfeeding</b> | <b>Baseline</b>                          | <b>Post-Overfeeding</b> |
| <b>1</b>       | 19.6                                  | 63.0                    | 74.5                                     | 102.3                   |
| <b>2</b>       | 74.8                                  | 71.5                    | 112.1                                    | 128.8                   |
| <b>3</b>       | 20.3                                  | 43.0                    | 79.3                                     | 99.7                    |
| <b>4</b>       | 42.9                                  | 62.7                    | 99.1                                     | 119.2                   |
| <b>5</b>       | 47.1                                  | 88.8                    | 92.7                                     | 132.7                   |
| <b>6</b>       | 87.9                                  | 46.9                    | 93.7                                     | 107.7                   |
| <b>7</b>       | 40.5                                  | 44.2                    | 90.4                                     | 98.8                    |
| <b>8</b>       | 22.0                                  | 51.0                    | 57.1                                     | 99.8                    |
| <b>9</b>       | 65.6                                  | 58.4                    | 89.9                                     | 102.4                   |
| <b>10</b>      | 43.1                                  | 56.5                    | 96.3                                     | 97.5                    |
| <b>11</b>      | 53.6                                  | 50.7                    | 100.8                                    | 98.5                    |
| <b>12</b>      | 76.5                                  | 63.3                    | 116.4                                    | 118.4                   |
| <b>13</b>      | 62.2                                  | 63.2                    | 122.4                                    | 117.4                   |
| <b>14</b>      | 47.4                                  | 88.3                    | 74.5                                     | 79.0                    |
| <b>15</b>      | 44.5                                  | 50.3                    | 100.8                                    | 98.1                    |
| <b>16</b>      | 51.7                                  | 60.2                    | 69.1                                     | 96.2                    |
| <b>17</b>      | 39.4                                  | 36.1                    | 84.3                                     | 97.8                    |
| <b>18</b>      | 84.4                                  | 68.7                    | 37.1                                     | 121.2                   |
| <b>19</b>      | 36.0                                  | 58.6                    | 83.0                                     | 100.4                   |
| <b>20</b>      | 38.8                                  | 56.6                    | 71.0                                     | 105.3                   |
| <b>21</b>      | 6.6                                   | 35.9                    | 53.2                                     | 76.7                    |
| <b>22</b>      | 61.5                                  | 31.3                    | 123.8                                    | 91.1                    |
